# Supplementary material for: Plasma-assisted electrolytic synthesis of In(OH)3 nanocubes for thermal transformation into In2O3 nanocubes with a controllable Sn content
Source: Royal Society of Chemistry journal article supplement (doi:10.1039/c5ra25489b), 2016-01-01
Supplement: c5ra25489b1.pdf [file c5ra25489b1.pdf]

## Supporting Information

### Plasma-assisted Electrolytic Synthesis of $\text{In}(\text{OH})_3$ Nanocubes Thermally Transformed into $\text{In}_2\text{O}_3$ Nanocubes with a Controllable Sn Content

Tae Hyung Kim,<sup>†</sup> Nu Si A Eom,<sup>†</sup> Sung-Oong Kang,<sup>\*,†</sup> Yong-Ho Choa<sup>\*,†</sup>

<sup>†</sup> *Department of Fusion Chemical Engineering, Hanyang University, Ansan 426 – 791, Republic of Korea*

\*Corresponding Author

Yong-Ho Choa

E-mail address: [choa15@hanyang.ac.kr](mailto:choa15@hanyang.ac.kr)

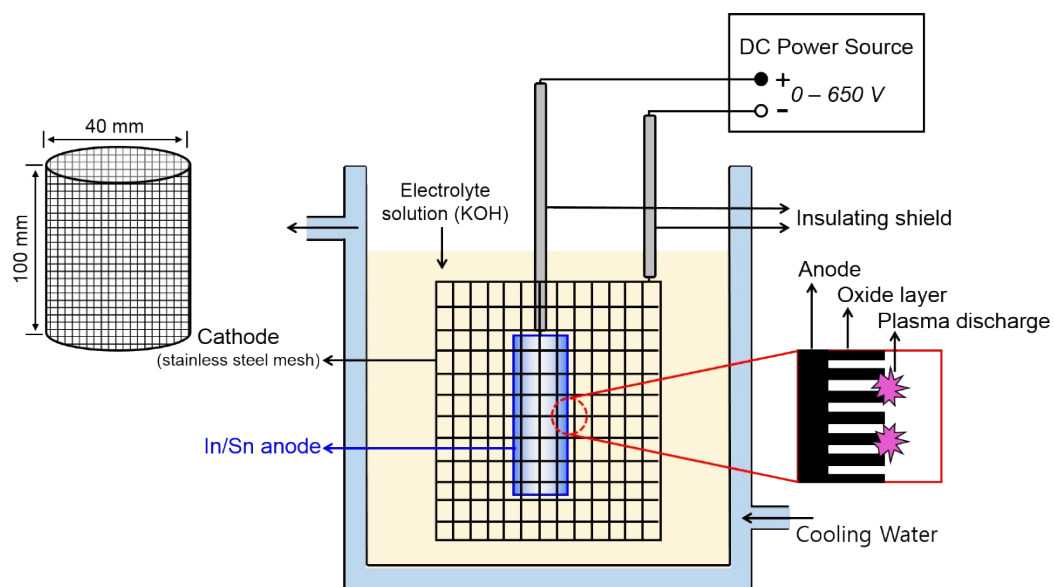

Figure S1. A schematic illustration of plasma-assisted electrolysis synthetic system

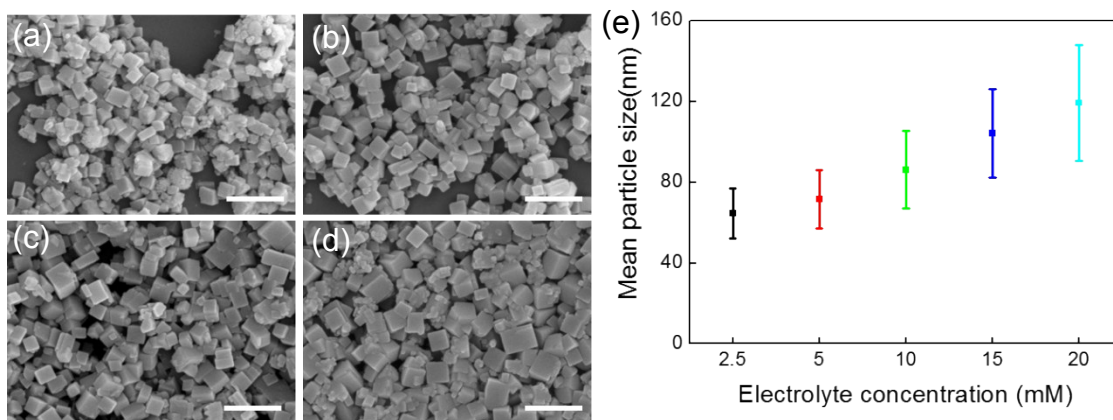

Figure S2. The SEM observations of  $\text{In}(\text{OH})_3$  nanocubes synthesized from the In/Sn alloy with the 15 wt.% content of Sn in the variable electrolyte concentration of (a) 2.5 mM, (b) 5 mM, (c) 15 mM and (d) 25 mM, respectively. (e) The size-dependence of  $\text{In}(\text{OH})_3$  nanocubes on the electrolyte concentration.

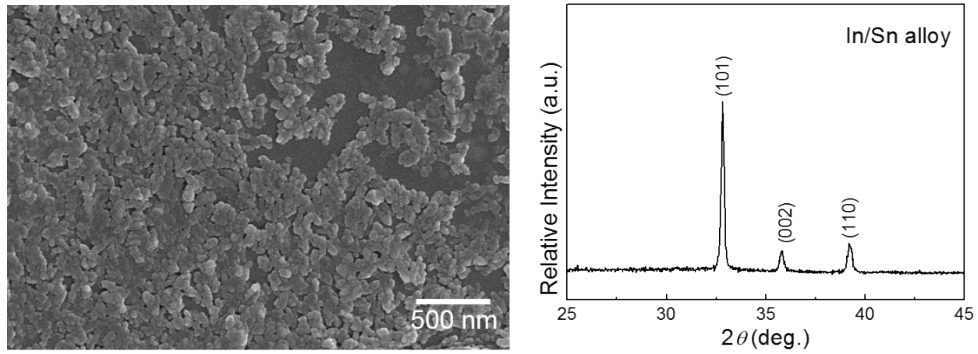

Figure S3. (a) The SEM image of nanoparticles precipitated by reducing the electrolyte solution prepared through the plasma-assisted electrolytic process of In/Sn alloy anode with the Sn content of 5 wt.% in the acidic solution of 10 mM H<sub>2</sub>SO<sub>4</sub>. (b) The XRD pattern of precipitated nanoparticles indexed to the body-centered tetragonal In (JCPDS card. No 85-1409).

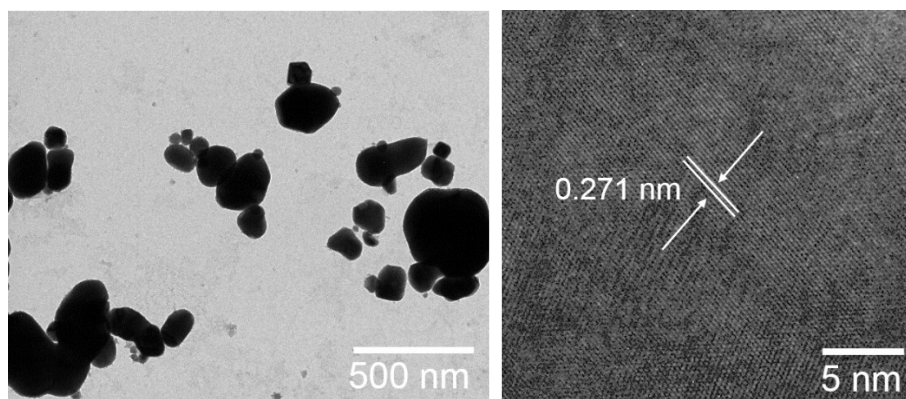

Figure S4. The TEM image represents the polyhedron morphology of In/Sn alloy nanoparticles prepared through the plasma-assisted electrolytic process of In/Sn alloy anode with the Sn content of 5 wt.% in the acidic solution of 10 mM  $\text{H}_2\text{SO}_4$ . (b) The microstructure observed using HRTEM shows the well-aligned lattice fringes with the interlayer spacing of 0.271 nm corresponding to the (101) plane of body-centered tetragonal In.

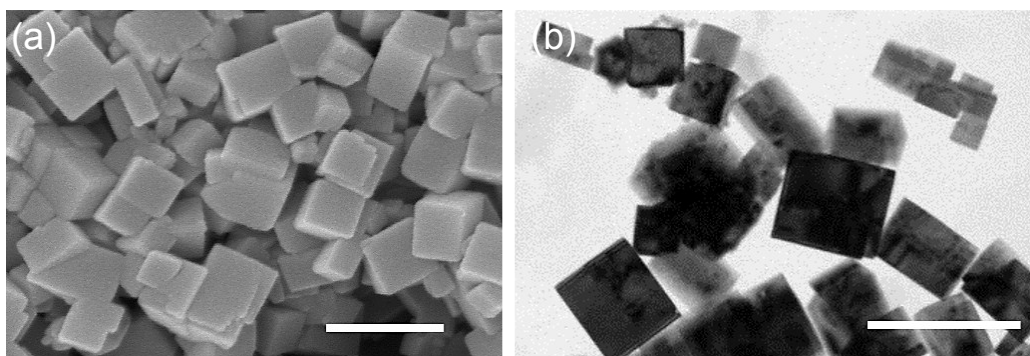

Figure S5. Magnified SEM and TEM images of  $\text{In}(\text{OH})_3$  nanocubes prepared with the electrolyte concentration of 10 mM. The small nanorods/cubes attached on the surface of as-grown large-sized nanocubes indicates the oriented attachment mechanism for the growth of cube-shaped morphology of  $\text{In}(\text{OH})_3$  nanocubes in our plasma-assisted electrolytic synthesis. The scale bar is 200 nm.
